# Supplementary material for: A simple three-dimensional-focusing, continuous-flow mixer for the study of fast protein dynamics
Source: Royal Society of Chemistry journal article supplement (doi:10.1039/c3lc50497b), 2013-01-01
Supplement: c3lc50497b.pdf [file c3lc50497b.pdf]

Supporting Information for

# A simple three-dimensional-focusing, continuous-flow mixer for the study of fast protein dynamics

*Kelly S. Burke, Dima Parul, Michael J. Reddish, R. Brian Dyer\**

Department of Chemistry, Emory University, Atlanta, Georgia

\*To correspondence should be addressed,  
(e-mail) [briandyer@emory.edu](mailto:briandyer@emory.edu); (phone) 404.727.6610

Included in the supporting information are a figure showing the fluorescence decay of the Eu microspheres, a table of the data points collected for the time resolution calibration, tables of fit variables and errors for the fit functions reported in the main article.

**Figure S-1.** Fluorescence decay signal of Eu microspheres. Data were fit to a single exponential of the form:  $y = y_0 + Ae^{-x/r}$ .  $r$  is the decay rate of Eu microsphere fluorescence.  $r$  was fit to  $548.2 \pm 0.3 \mu\text{s}$ .

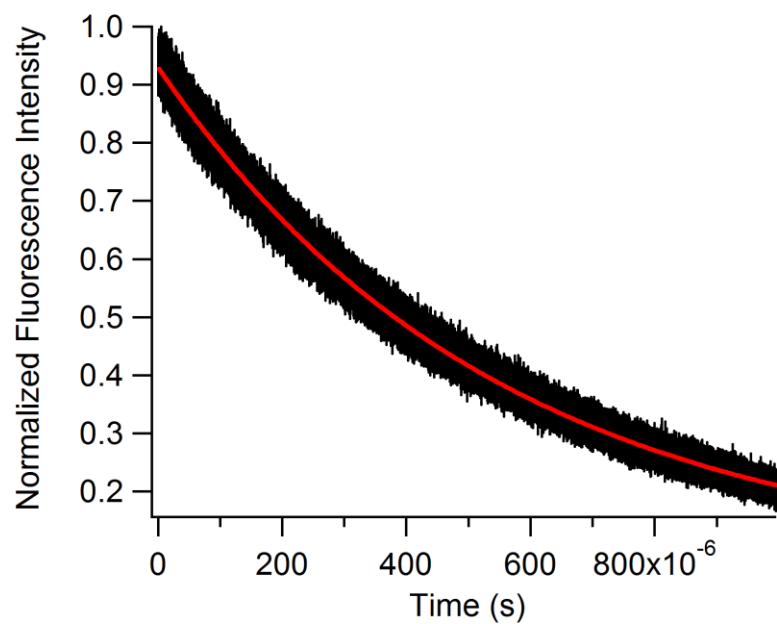

**Table S-1.** Data Used for Time Calibration with Error

| Flow Rate, mL/min | Time Calibration, $\mu\text{s}/\text{pixel}$ |
|-------------------|----------------------------------------------|
| 0.187             | $3.20 \pm 0.01$                              |
| 0.213             | $2.526 \pm 0.005$                            |
| 0.284             | $2.181 \pm 0.007$                            |
| 0.288             | $2.43 \pm 0.01$                              |
| 0.330             | $2.361 \pm 0.004$                            |
| 0.382             | $2.147 \pm 0.009$                            |
| 0.430             | $1.925 \pm 0.008$                            |
| 0.436             | $2.015 \pm 0.004$                            |
| 0.472             | $1.901 \pm 0.005$                            |
| 0.529             | $1.707 \pm 0.004$                            |
| 0.574             | $1.453 \pm 0.006$                            |
| 0.585             | $1.644 \pm 0.009$                            |
| 0.615             | $1.294 \pm 0.008$                            |
| 0.721             | $1.502 \pm 0.008$                            |
| 0.867             | $1.472 \pm 0.009$                            |
| 0.958             | $1.15 \pm 0.01$                              |

**Table S-2.** Fit Coefficients and Error for Time Calibration Data

| Fit Variable | Fit Value | Error in Value |
|--------------|-----------|----------------|
| $y_0$        | 1.1338    | 0.202          |
| $A$          | 3.4645    | 0.5            |
| $r$          | 3.3673    | 0.946          |

Data was fit to a single exponential of the form:  $y = y_0 + Ae^{-x \cdot ru}$

**Table S-3.** Fit Coefficients and Error for Mixing Time Data

| Fit Variable | Fit Value | Error in Value |
|--------------|-----------|----------------|
| $y_0$        | 81.57     | 4.63           |
| $A$          | 531.45    | 11.3           |
| $r$          | 2.9776    | 0.946          |

Data was fit to a single exponential of the form:  $y = y_0 + Ae^{-x \cdot ru}$

**Table S-4.** Fit Coefficients and Error for ApoMb Unfolding Data

| Fit Variable | Fit Value | Error in Value |
|--------------|-----------|----------------|
| $y_0$        | 759.76    | 7.83           |
| $A$          | 82954     | 11300          |
| $r$          | 8.7592    | 0.278          |

Data was fit to a single exponential of the form:  $y = y_0 + Ae^{-x \cdot ru}$
